# Supplementary material
Source: MDPI journal article supplement (https://www.mdpi.com/2311-7524/9/9/1054)
Supplement: s1 [file s1 › Supplementary figures.pdf]

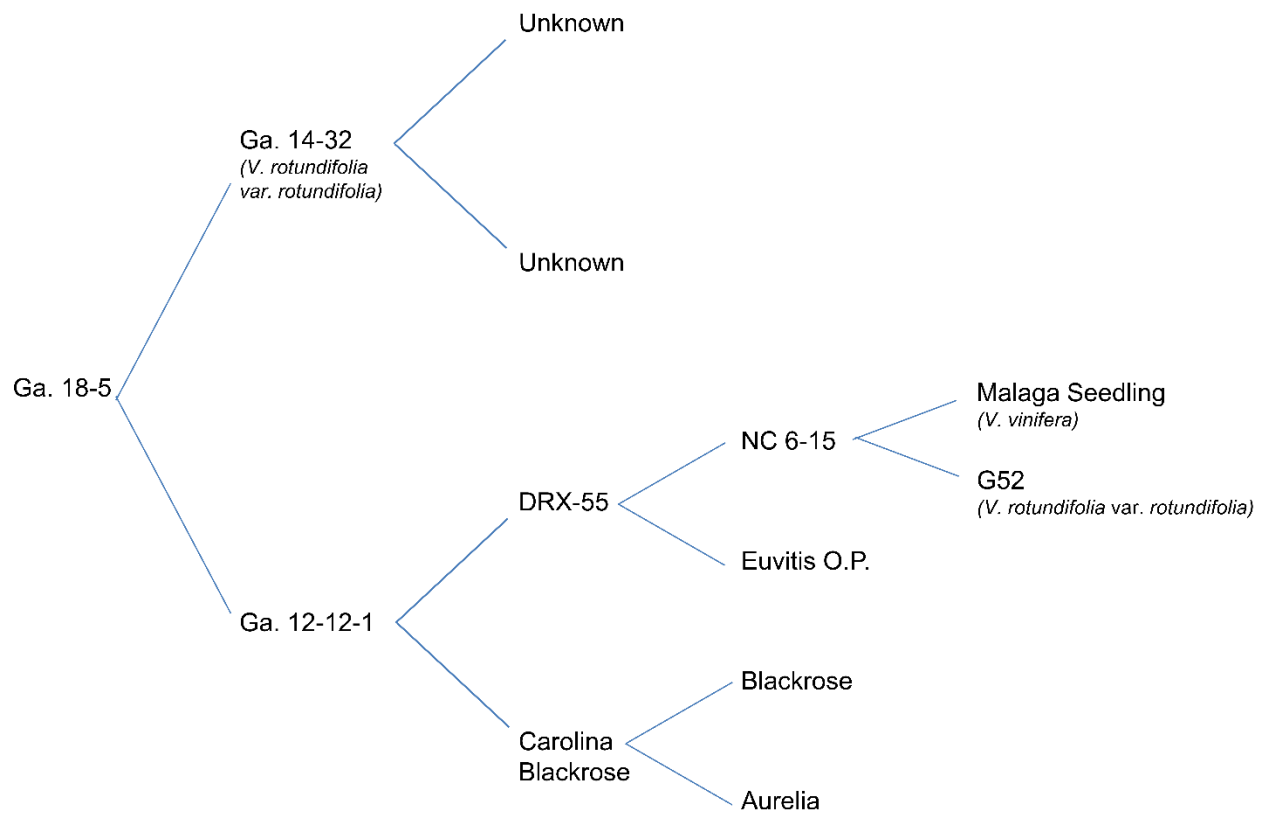

Figure S1: Pedigree of muscadine selection Ga. 18-5 showing its development via complex hybridization steps.

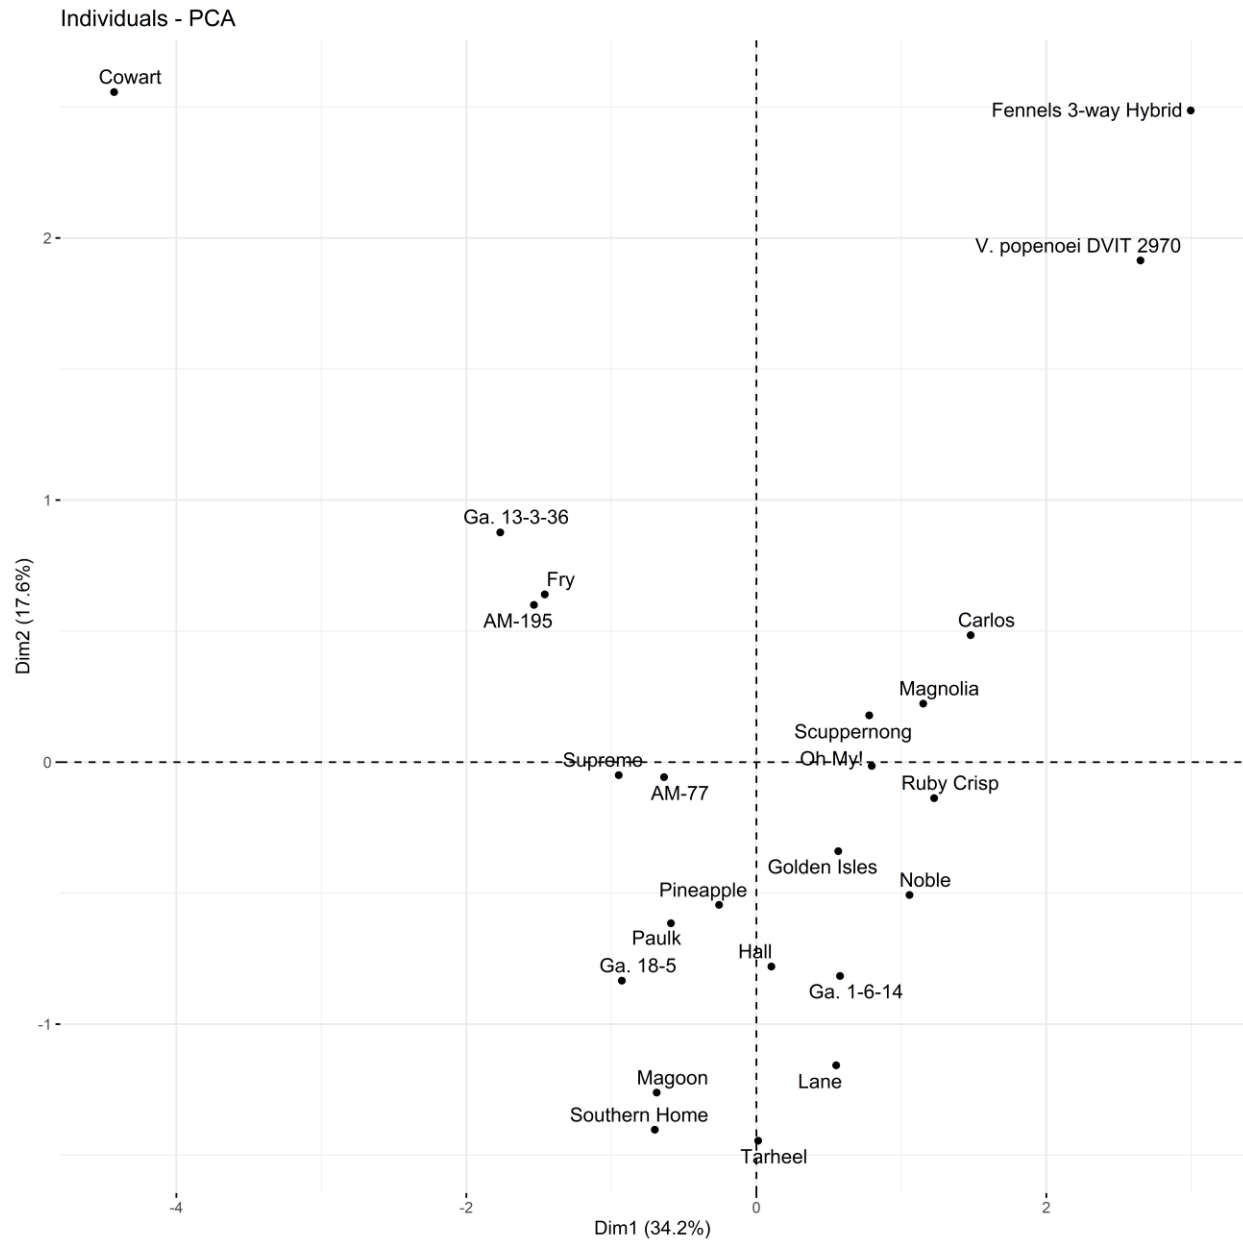

Figure S2: PCA plot of twenty-four muscadine genotypes obtained using total amount of volatile compounds in each chemical class as variables.

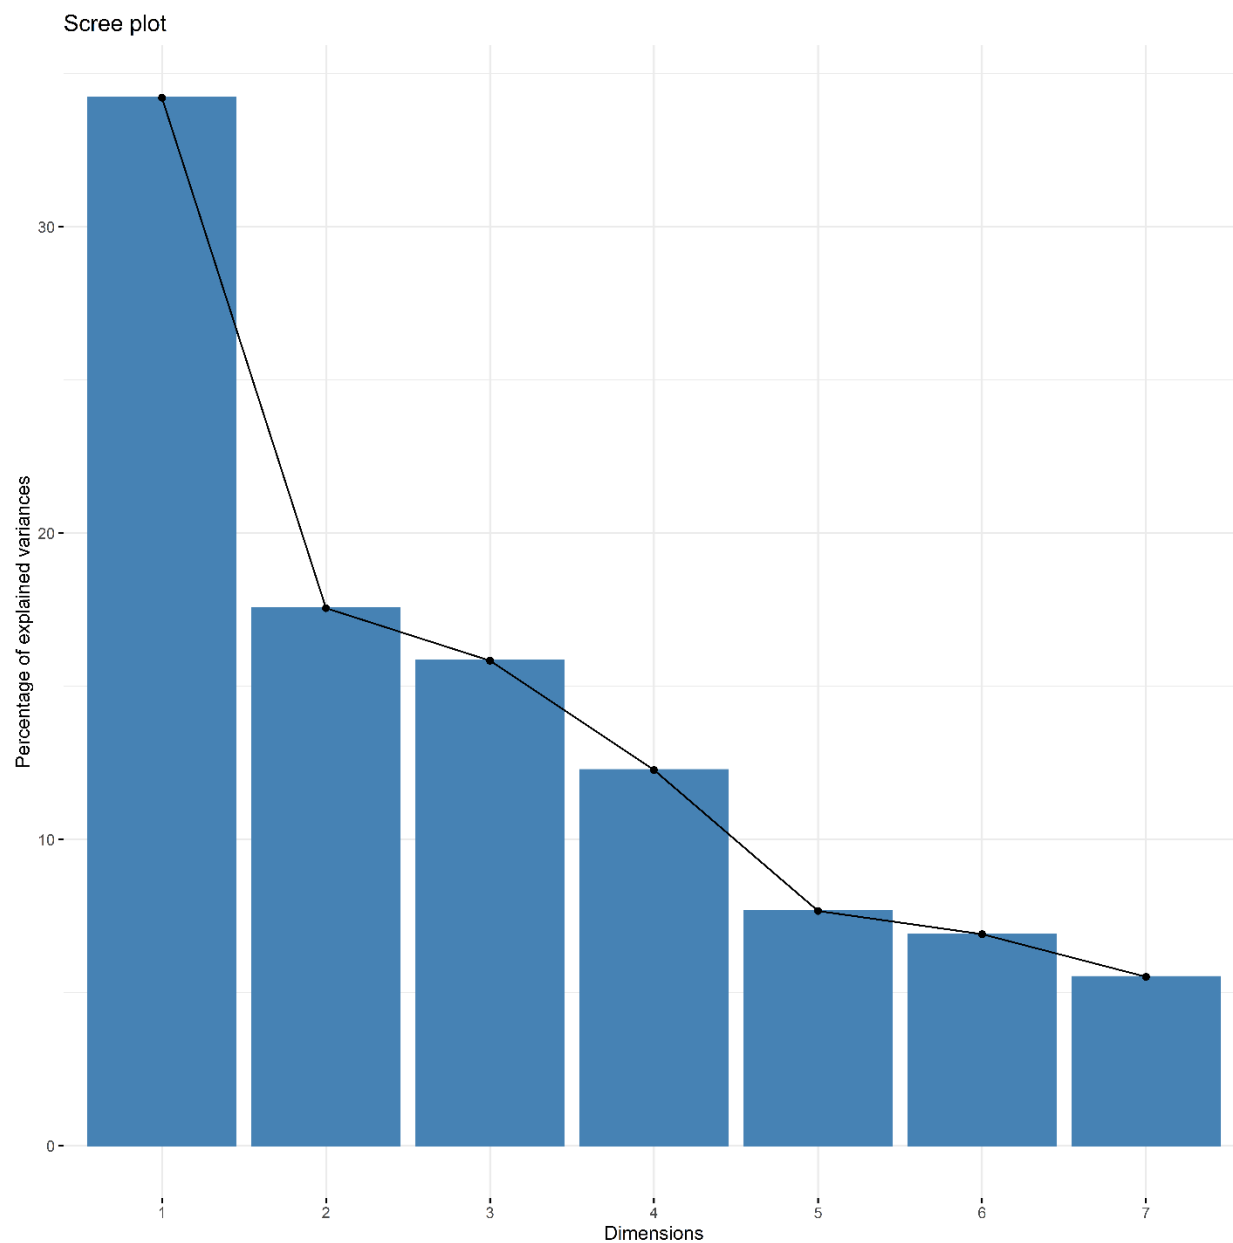

Figure S3: Scree plot showing percentage of variation in composition of volatile compound class between genotypes explained by first seven principal components obtained from PCA.

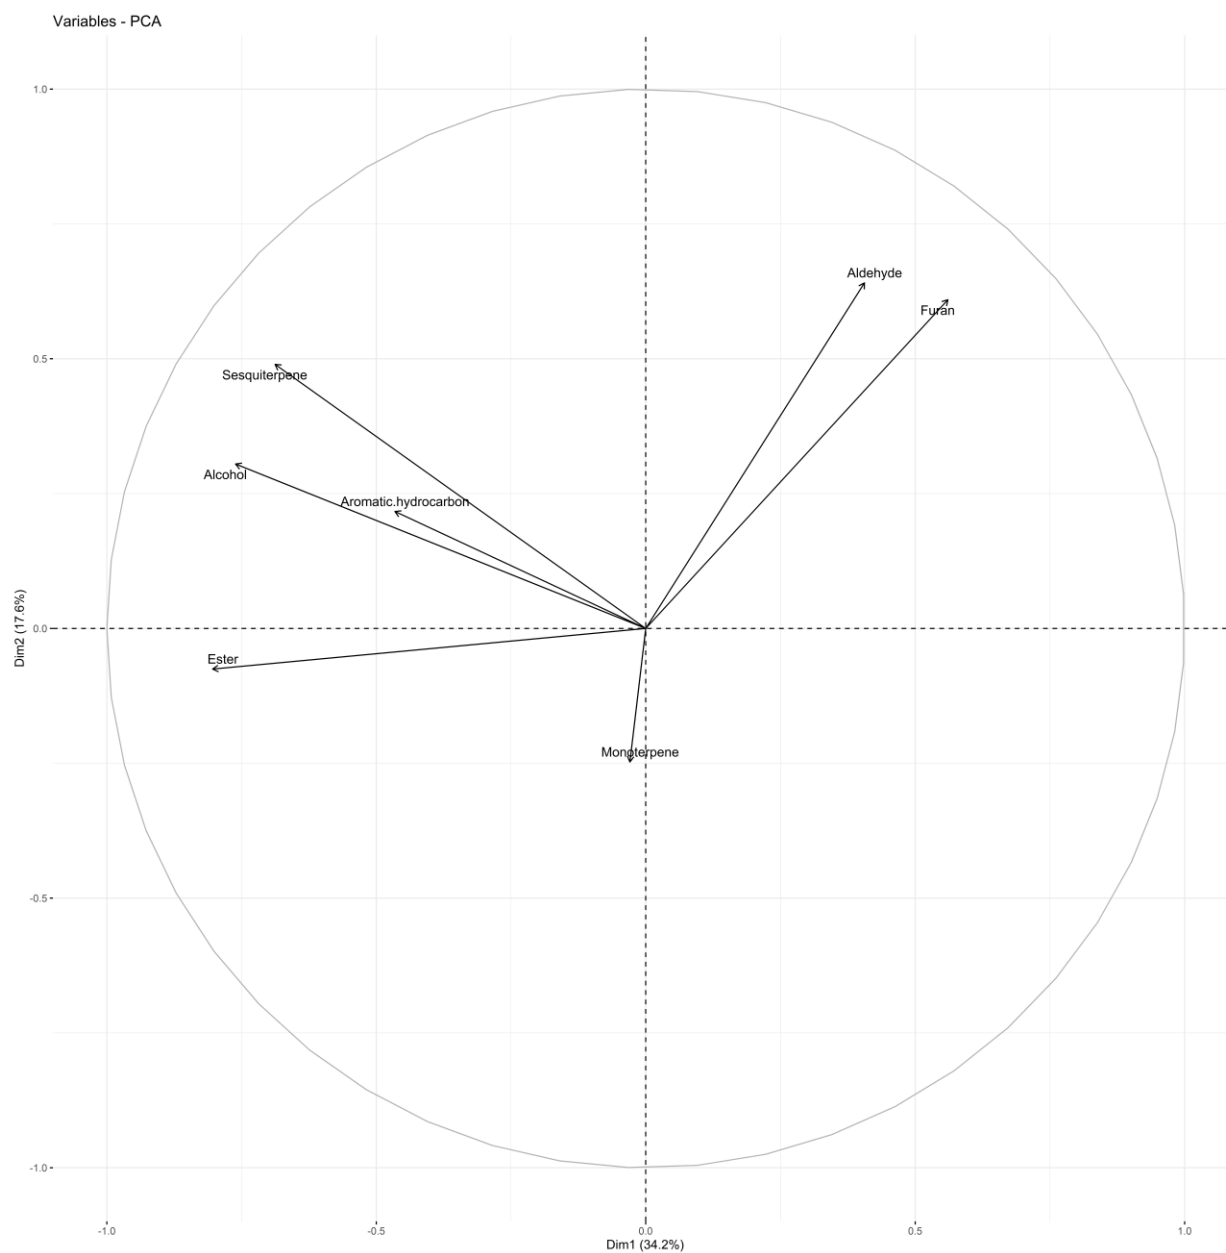

Figure S4: PCA loading biplot showing contribution of each volatile compounds class to first (PC1) and second (PC2) principal components. Length of arrow represents the amount of contribution made by the volatile compound class.
