# Supplementary material
Source: MDPI journal article supplement (https://www.mdpi.com/2311-7524/9/9/1054)
Supplement: s1 [file s1 › Supplementary file.xlsx]

## Sheet: Table S1
Table S1: Color, firmness, titratable acidity (TA), and total soluble solid (TSS) contents in ‘Carlos' berries at various stages of maturity.
Ripening stage			Color componentsy													Firmness (N)			TA (%)z			TSS (%)
	L*(C)			a*(C)			b*(C)			C*(C)			h(C)
S1 (Unripe)	52.9		a	-5		d	17.3		a	18.1		a	106		a	2.6		a	0.9		a	9.3		d
S2 (Slightly ripe)	51.7		a	-3.1		c	15.9		b	16.2		b	100.7		b	2.6		ab	0.8		ab	10.4		c
S3 (Fully ripe)	48.7		b	0.6		b	13		c	13.2		c	86.6		c	2.4		ab	0.6		bc	12.6		b
S4 (Overripe)	44.7		c	3.5		a	11.3		d	12		c	72.7		d	2.4		b	0.6		c	13.6		a
Means with different letters in the same column indicates significant differences (Tukey HSD test P < 0.05).
yColor components defined by Commission internationale de l'éclairage (CIE)
L* indicates lightness (lighter or darker, + = lighter, – = darker) a* is the red/green coordinate (+ = redder, – = greener)) b* is the yellow/blue coordinate (+ = yellower, – = bluer) C* chroma (+ = brighter, – = duller) h* Hue angle (starts at the +a* axis and is expressed in degrees (e.g., 0° is +a*, or red, and 90° is +b, or yellow) All measurements were taken after calibrating the instrumet …
zTitratable acidity (%) expressed as tartaric acid.

## Sheet: Table S2
Table S2: Volatile concentration (ng/g of sample) at various stages of berry ripening in ‘Carlos’ muscadine cultivar.
Volatile compound	Aroma description	Retention index (RI)	Ripening stage												Significance (P-value)z
			S1			S2			S3			S4
Ethyl Acetate	Sweet, fruity odor	612	104.5		c	740.6		b	1578.1		a	1994.7		a	<0.001
Hexanal	Freshly cut grass and unripe effect	801	740.2		a	694.9		ab	528.5		cb	399.6		c	<0.001
Acetic acid, butyl ester	Fruity	812	1.1		b	132.3		b	431.8		a	646.9		a	<0.001
2-Butenoic acid, ethyl ester, (Z)-	Smell found in Mango	830	6.8		b	58.4		ab	89		a	93		a	<0.001
2-Hexenal, (E)-	Fresh green odor	854	4070.4		a	3576.1		a	2684.6		b	2393.5		b	<0.001
2,4-Hexadienal, (E,E)-	Citrus	911	12		a	7.8		a	1.6		b	0		b	<0.001
Hexanoic acid, ethyl ester	Fruity type odor	999	0		c	27.9		b	53.4		a	72.7		a	<0.001
Acetic acid, hexyl ester	Mild sweet	1011	0		b	13.7		b	80.6		a	135.3		a	<0.001
Eucalyptol	Fresh mint-like	1032	122.9		a	107		a	54.1		bb	27.2		b	<0.001
Benzeneacetaldehyde	Honey, floral rose	1045	0		c	0		c	34.6		ab	69.2		a	<0.001
1-Octanol	Pungent odor	1070	0		c	11		bc	60.2		ab	105.8		a	<0.001
Phenylethyl Alcohol	Rose-like smell	1116	0		c	0		c	25.7		b	74		a	<0.001
Acetic acid, phenylmethyl ester	Floral type odor, fruity type flavor	1164	0		a	0		a	5.4		a	11.1		a	<0.05
Hexanoic acid, butyl ester	Fruity type odor	1189	6.8		b	30.4		b	63.9		a	62.8		a	<0.001
Octanoic acid, ethyl ester	Strong odor of fruit and flowers	1196	0		c	6.2		c	27.7		b	41.6		a	<0.001
Acetic acid, 2-phenylethyl ester	Floral type odor, honey type flavor	1210	4.9			10.1			13.7			50.5			ns
Acetic acid, octyl ester	Floral type odor, waxy type flavor	1210	0			0			2.4			4.9			ns
Caryophyllene	Warm, peppery aroma	1419	0			0			10.7			53.4			ns
Means with different letters in the same row indicates significant differences.
zns: not significant

## Sheet: Table S3
Table S3: Volatile composition (ng/g of sample) of muscadine genotypes.
Volatile compounds	Aroma categoryy	Aroma descriptiony	Significancez	Retention index (RI)	AM-195			AM-77			Carlos			Cowart			Fennel's 3-way Hybrid			Fry			Ga. 1-6-14			Ga. 13-3-36			Ga. 18-5			Golden Isles			Hall			Lane			Magnolia			Magoon			Noble
Alcohol					686.181	0		138.1	0		7.85004	0		1375.14	0		0	0		1390.41	0		154.758	0		277.095	0		239.371	0		63.2909	0		196.531	0		96.1306	0		206.74	0		317.288	0		66.4325	0
(Z)-4-Decen-1-ol	Waxy	fruity	<0.001	1257	0		c	0		c	0		c	539.743		a	0		c	476.537		a	0		c	0		c	0		c	0		c	30.3588		bc	25.8662		bc	12.1196		c	160.833		b	0		c
1-Hexanol	green/fat	grass, herbal, banana	<0.001	686	136.339		bcde	65.5384		cde	0		e	345		a	0		e	261.929		ab	0		e	25.7612		de	139.272		bcd	59.9346		cde	98.7681		cde	0		e	121.101		cde	73.8395		cde	0		e
1-Octanol	chemical	chemical, metal	<0.001	1070	180.719		bc	71.5425		cde	7.85004		de	423.922		a	0		e	503.257		a	6.12862		e	67.0421		cde	66.1761		cde	2.79174		e	33.7474		de	60.2866		cde	73.5189		cde	81.7535		cde	66.4325		cde
2-Hexen-1-ol, (E)-	green/fat	blue cheese, vegetable	ns	862	21.8065			0			0			0			0			0			8.27635			0			0			0			0			0			0			0			0
2-Hexen-1-ol, (Z)-	green	-	<0.05	868	0		b	0		b	0		b	0		b	0		b	0		b	16.2799		ab	0		b	0		b	0		b	0		b	0		b	0		b	0		b	0		b
5-Decen-1-ol, (Z)-	waxy, fatty	rose	ns	-	0			0			0			0			0			0			0			0			0			0			0			9.97779			0			0			0
Phenylethyl Alcohol	floral	rose, honey	<0.001	1116	347.316		a	1.01905		e	0		e	66.476		cde	0		e	148.692		bc	124.073		bcd	184.292		b	33.9234		de	0.564557		e	33.6563		de	0		e	0		e	0.862447		e	0		e
Aldehyde					2674.91			2118.25			3782.94			2498.06			3879.79			2876.28			1915.88			2692.98			1953.64			2482.56			2626.36			2602.91			3152.53			983.495			2298.77
2,4-Hexadienal, (E,E)-	green/fat	olive, peanuts, caviar	<0.001	911	2.40723		b	0		b	5.08371		b	0		b	12.0992		b	3.01099		b	1.94779		b	0		b	0		b	1.83908		b	1.11851		b	0		b	7.11601		b	0		b	1.23618		b
2,5-Furandicarboxaldehyde	-	-	ns	1076	0			0			0			0			0			0			0			0			14.1365			0			0			0			0			0			0
2-Hexenal	floral	herbal tea, spearmint, wheat	ns	851	0			0			6.21067			0			19.5521			0			0			0			0			0.366577			0.744215			0			0			0			7.85514
2-Hexenal, (E)-	green	fruity, vegetable-like	<0.001	854	2109.42		abcdefg	1822.24		cdefgh	3012.01		ab	1931.44		bcdefgh	3088.05		a	2539.69		abcde	1709.76		cdefgh	2276.28		abcdef	1638.3		defgh	1971.68		abcdefgh	2173.44		abcdefg	1959.03		abcdefgh	2546.68		abcde	911.018		hi	1897.96		bcdefgh
Benzaldehyde	roasted/carmelized	almond, caramel	ns	962	0			0			0			0			0			0			0			8.46979			0			0			0			0			0			0			0
Benzeneacetaldehyde	pungent/green/floral	sweet, lilac, hyacinth	<0.001	1045	27.4603		a	1.75984		bc	1.90706		bc	20.7397		ab	0		c	9.74616		abc	27.524		a	13.567		abc	0		c	0		c	0		c	0		c	0		c	2.99075		bc	0		c
Citral	floral	lemon, bitter	<0.001	1273	30.9001		bcde	0		g	0		g	21.6902		cdefg	0		g	23.5544		cdef	3.87796		fg	12.2354		efg	0		g	0		g	44.2203		abc	63.1428		a	0		g	0		g	0		g
Heptanal	green/fat	chemical, green, fresh	ns	901	0			0			0			0			0			0			0			0			0			0			0			0			0			0			0
Hexanal	green/fat	green, herbal	<0.001	801	504.723		bcdef	289.257		defg	755.432		b	524.183		bcde	760.096		b	297.165		defg	169.478		efg	382.428		bcdefg	298.866		defg	508.679		bcdef	406.84		bcdefg	580.731		bcde	598.734		bcd	69.4871		g	391.723		bcdefg
Nonanal	green/fat	fat, citrus, green	ns	1104	0			4.99261			2.30187			0			0			3.11876			3.29703			0			2.33332			0			0			0			0			0			0
Aromatic hydrocarbon					200.482			159.528			0			97.207			0			0			0			14.3866			0			26.2981			0			0			0			25.6841	0		0
Anethole	-	sweet, anise oil	ns	1287	7.41333			3.37758			0			2.03394			0			0			0			2.02073			0			0			0			0			0			0			0
Estragole	green/herbal	anise oil	<0.001	1196	193.069		a	156.15		ab	0		d	95.1731		bc	0		d	0		d	0		d	12.3659		cd	0		d	26.2981		cd	0		d	0		d	0		d	25.6841		cd	0		d
Ester					3055.4			2577.45			804.3			5340.29			13.3082			3560.85			1183.21			5178.77			6162.38			1751.28			3329.33			2132.75			298.471			3278.14			306.05
2-Butenoic acid, 1-methylethyl ester	-	-	ns	-	0			0			0			0			0			0			4.73827			6.40791			0			0			5.19915			0			0			0			0
2-Butenoic acid, butyl ester	-	-	<0.001	1046	113.988		b	4.88252		b	0		b	82.7177		b	0		b	163.503		b	107.539		b	465.09		a	168.142		b	254.266		ab	277.974		ab	56.8398		b	1.66962		b	48.569		b	0		b
2-Butenoic acid, ethyl ester, (E)-	fermented	sweet alliaceous caramel rum	<0.001	835	158.423		ab	0		b	0		b	129.055		b	0		b	558.561		a	117.053		b	0		b	0		b	250.082		ab	0		b	101.794		b	0		b	0		b	0		b
2-Butenoic acid, ethyl ester, (Z)-	fruity	pungent, sour caramellic	<0.001	830	302.449		cd	78.3355		d	20.6944		d	612.331		bcd	0		d	187.354		cd	222.939		cd	1370.43		ab	1663.35		a	322.478		cd	656.508		bcd	155.795		cd	0		d	666.04		bcd	0		d
2-Butenoic acid, hexyl ester	fruity	pear, pineapple	ns	-	0			0			0			0			0			0			6.30368			0			0			0			0			0			0			0			0
2-Hexen-1-ol, acetate, (Z)-	-	-	<0.05	1006	8.98932		a	0		b	0		b	0		b	0		b	0		b	0		b	0		b	0		b	0		b	0		b	0		b	0		b	0		b	0		b
2-Hexenoic acid, ethyl ester	fruity, green, sweet	tropical nuances, grape, berry and apple	<0.001	1041	0		b	0		b	0		b	0		b	0		b	0		b	0		b	0		b	10.828		a	0		b	0		b	0		b	0		b	0		b	0		b
2-Methylpentyl hexanoate	-	-	ns	-	0			2.92439			0			0			0			0			0			0			0			0			0			0			0			0			0
Acetic acid, 2-phenylethyl ester	fruity	very sweet, rosy-fruity honey-like	<0.001	1258	346.493		a	21.6239		b	0		b	0		b	12.056		b	0		b	101.174		b	161.665		ab	35.6788		b	11.7331		b	21.0549		b	0		b	0		b	0		b	0		b
Acetic acid, butyl ester	fruity	apple, banana, glue	<0.001	812	553.389		bcd	401.016		cde	159.116		efgh	656.89		abc	0		h	583.894		bcd	152.672		efgh	566.954		bcd	319.859		cdefgh	356.785		cdef	541.656		bcd	294.286		defgh	126.238		efgh	796.65		ab	29.8924		fgh
Acetic acid, heptyl ester	fresh green rum ripe fruit	woody, citrus, pear, apricot	ns	1112	0			0			0			0			0			0			0			0			0			0			0			0			0			0			0
Acetic acid, hexyl ester	fruity	apple, banana	<0.001	1011	179.116		bc	339.197		bc	43.4804		c	799.002		a	0		c	169.596		bc	9.69813		c	57.3539		c	140.571		bc	24.826		c	116.004		bc	31.8541		c	10.737		c	435.07		b	10.585		c
Acetic acid, octyl ester	fruity	orange-like, jasmine-like	<0.001	1210	26.5304		b	25.9528		b	0		b	91.4866		a	0		b	8.47441		b	0		b	0		b	2.38009		b	0		b	0		b	3.42579		b	0		b	0		b	10.5791		b
Acetic acid, pentyl ester	fruity	pear, banana, apple	<0.001	910	17.2855		a	3.53638		ab	0		b	18.8599		a	0		b	0		b	0		b	0		b	0		b	0		b	0		b	0		b	0		b	10.9568		ab	0		b
Acetic acid, phenylmethyl ester	floral, fruity	jasmine, pear	<0.001	1164	35.2797		ab	70.061		a	7.54122		b	20.8334		b	0		b	0		b	1.73759		b	14.3893		b	2.75063		b	0		b	0		b	3.51343		b	0		b	12.0527		b	0		b
Butanoic acid, 3-hydroxy-, ethyl ester	fruity, green	grape, tropical, apple skin	ns	943	0			0			0			0			0			0			0			0			3.99783			0			0			0			0			0			0
Butanoic acid, butyl ester	fruity	pineapple	<0.001	995	27.1764		b	8.76214		b	0		b	28.0282		b	0		b	32.281		b	45.1234		b	115.799		ab	75.9342		ab	38.3927		b	144.469		ab	36.827		b	8.87339		b	38.0389		b	0		b
Butanoic acid, ethyl ester	fruity	pineapple	<0.001	802	0		d	0		d	0		d	70.8409		cd	0		d	158.353		cd	97.5822		cd	449.939		a	430.921		ab	141.147		cd	115.733		cd	0		d	0		d	202.444		abcd	0		d
Ethyl Acetate	fruity, ethereal	sweet, grape, cherry	<0.001	612	1145.02		bcd	1360.36		bc	510.805		defg	1789.22		ab	0		g	1204.35		bcd	263.196		efg	1533.98		bc	2368.17		a	259.853		efg	1022.94		bcde	1248.34		bcd	36.613		g	951.685		cdef	254.994		efg
Formic acid, heptyl ester	green, waxy, fruity, floral	orris-rose, plum, apple, cucumber	<0.001	1039	0		a	0		a	0		a	0		a	0		a	0		a	0		a	28.8214		a	9.14804		a	12.1502		a	0		a	0		a	0		a	0		a	0		a
Formic acid, hexyl ester	fruity, green	apple, unripe plum, banana, sweet	ns	914	0			0			0			0			0			0			0			0			0			0			0			0			0			0			0
Heptanoic acid, ethyl ester	fruity	pineapple, wine, brandy-like	<0.001	1098	0		c	0		c	0		c	26.0316		a	0		c	0		c	0		c	0		c	8.88049		b	0		c	0		c	0		c	0		c	0		c	0		c
Heptanoic acid, methyl ester	fruity	sweet, waxy apple like note, orris	ns	1023	0			0			0			0			1.25219			0			0			0			0			0			0			0			0			0			0
Hexanoic acid, 1-methylethyl ester	fruity	pineapple, loganberry	<0.001	1034	0		d	32.5953		bc	1.72026		d	32.9032		b	0		d	0		d	6.39246		bcd	14.1212		bcd	1.99297		d	0		d	77.4388		a	0		d	0		d	9.57397		bcd	0		d
Hexanoic acid, butyl ester	fruity	pineapple, berry, apple	<0.001	1189	65.8921		bcde	136.617		abcde	35.1274		cde	182.03		abc	0		e	157.39		abcd	17.2509		de	69.0277		bcde	117.963		abcde	36.4288		cde	199.071		ab	67.4537		bcde	41.6234		cde	47.8076		cde	0		e
Hexanoic acid, ethyl ester	fruity	apple peel, strawberry, anise	<0.001	999	75.3716		d	78.1375		d	19.5803		d	663.961		ab	0		d	248.562		cd	29.8135		d	292.008		cd	709.778		a	43.1375		d	102.443		d	100.245		d	44.0539		d	59.2484		d	0		d
Hexanoic acid, hexyl ester	fruity	apple, peach, plum	<0.05	1348	0		a	9.30462		a	0		a	21.4486		a	0		a	11.1301		a	0		a	0		a	5.6614		a	0		a	0		a	0		a	0		a	0		a	0		a
Hexanoic acid, propyl ester	fruity	pineapple, blackberry	<0.001	1094	0		c	0		c	0		c	10.639		ab	0		c	6.87217		abc	0		c	0		c	5.8775		abc	0		c	7.65663		abc	0		c	0		c	0		c	0		c
Octanoic acid, ethyl ester	fruity	apricot, brandy	<0.001	1196	0		c	0		c	6.23528		bc	97.1213		a	0		c	70.5275		abc	0		c	32.7897		abc	77.0735		abc	0		c	38.3432		abc	32.3748		abc	28.6624		abc	0		c	0		c
Propanoic acid, 2-methyl-, propyl ester	fruity	melon, berry, pineapple	ns	-	0			0			0			0			0			0			0			0			3.41967			0			0			0			0			0			0
n-Octanoic acid isopropyl ester	fruity	carao, banana, coconut	ns	-	0			4.14253			0			6.89233			0			0			0			0			0			0			2.83457			0			0			0			0
Furan					0			0			0			0			16.291			22.2063			0			0			21.8441			0			0			0			0			0			0
1-Oxaspiro[4.5]dec-6-ene, 2,6,10,10-tetramethyl-	green, herbal	woody, cooling, minty, camphoreous	<0.001	1302	0		b	0		b	0		b	0		b	16.291		a	0		b	0		b	0		b	0		b	0		b	0		b	0		b	0		b	0		b	0		b
2(5H)-Furanone, 5-ethyl-	spice	-	ns	966	0			0			0			0			0			0			0			0			0			0			0			0			0			0			0
5-Hydroxymethylfurfural	fatty	buttery, musty, waxy, caramellic, chamomile	ns	1232	0			0			0			0			0			22.2063			0			0			21.8441			0			0			0			0			0			0
Furan, 2-ethyl-	chemical	beany, bready, malty	ns	703	0			0			0			0			0			0			0			0			0			0			0			0			0			0			0
Furan, 2-pentyl-	fruity, green	earthy, beany, metallic	<0.001	993	0		b	0		b	0		b	0		b	0		b	0		b	0		b	0		b	0		b	0		b	0		b	0		b	0		b	0		b	0		b
Monoterpene					313.73			0			33.3663			92.0184			19.8159			195.844			98.1597			186.529			6.1621			36.4507			615.478			997.343			12.705			10.1829			19.8197
beta-Ocimene	sweet, herbal	-	<0.001	1037	0		b	0		b	0		b	0		b	0		b	0		b	0		b	0		b	0		b	0		b	0		b	0		b	0		b	0		b	0		b
beta-Pinene	floral	pine, wood	<0.001	979	40.0653		bcd	0		d	0		d	9.81395		d	0		d	24.0311		cd	10.351		d	19.9831		cd	0		d	0		d	42.61		bcd	123.192		a	0		d	0		d	0		d
3-Carene	green/fat	nutmeg	<0.001	1011	273.665		de	0		f	0		f	82.2045		f	19.8159		f	171.813		ef	83.3247		f	147.62		ef	0		f	34.0494		f	567.387		bc	805.322		a	0		f	8.5226		f	6.50019		f
Citronellol	floral	rose, citrus, clove	<0.001	1228	0		d	0		d	0		d	0		d	0		d	0		d	3.02715		cd	18.9251		ab	0		d	0		d	2.92073		cd	27.6887		a	0		d	0		d	0		d
D-Limonene	fruity	citrus, mint	<0.001	1031	0		d	0		d	0		d	0		d	0		d	0		d	1.45681		d	0		d	0		d	2.40133		cd	2.5602		cd	19.4862		a	0		d	0		d	0		d
Eucalyptol	fruity	camphor	<0.001	1032	0		b	0		b	33.3663		a	0		b	0		b	0		b	0		b	0		b	6.1621		b	0		b	0		b	0		b	12.705		b	1.66027		b	13.3195		b
Geranic acid	faint green floral	-	<0.01	1355	0		b	0		b	0		b	0		b	0		b	0		b	0		b	0		b	0		b	0		b	0		b	21.6541		a	0		b	0		b	0		b
Sesquiterpene					0			0			0			21.4864			0			0			0			14.3667			0			0			0			0			0			0			0
Caryophyllene	floral	wood	<0.05	1419	0		b	0		b	0		b	21.4864		a	0		b	0		b	0		b	14.3667		ab	0		b	0		b	0		b	0		b	0		b	0		b	0		b
Total volatile (ng/gm of sample)			<0.001		6930.7		bcde	4993.33		defghi	4628.46		efghi	9424.2		a	3929.21		fghi	8045.6		abc	3352.02		hij	8364.12		ab	8383.4		ab	4359.88		fghi	6767.69		bcde	5829.13		cdefg	3670.45		ghi	4614.79		efghi	2691.08		ij
Means with different letters in the same row indicate significant difference between genotypes.
yInformation on aroma category and description was collected from the database of Good Scents Company Information System (http://www.thegoodscentscompany.com/) and PubChem (https://pubchem.ncbi.nlm.nih.gov/)
zns: not significant
[truncated: 20 more columns]

## Sheet: Table S4
Table S4: PC scores of muscadine genotypes with each volatile compound as a separate variable.
Genotype	PC1	PC2	PC3	PC4	PC5	PC6	PC7	PC8	PC9	PC10	PC11	PC12	PC13	PC14	PC15	PC16	PC17	PC18	PC19	PC20	PC21	PC22	PC23	PC24
AM-195	1.93106	3.213	5.20157	5.08377	2.04589	-0.754808	-0.230207	1.43209	-0.646633	0.0237515	-0.839096	0.19838	-0.414498	0.428728	-0.472326	0.456649	-0.301533	0.128577	-0.298411	0.336034	0.245946	0.135726	0.107466	-3.05311e-16
AM-77	0.845701	-0.883705	2.488	0.7722	-1.48123	-1.56956	2.87565	-1.94039	-0.869731	0.552209	-1.62363	0.533334	1.80003	-1.68621	0.151166	-0.808357	-0.160335	0.0420445	0.450568	-0.120962	-0.283052	-0.0275726	-0.0465471	-3.1572e-16
Carlos	-3.08366	-1.94594	0.387869	-0.724434	0.730686	-0.295775	2.14731	1.10304	1.01836	0.0986845	0.0523842	-2.70736	0.570313	0.596365	-0.190832	-0.138716	-1.18549	0.0757647	-0.395408	0.243879	0.267119	-0.451891	-0.194163	1.56125e-16
Cowart	10.1299	-1.47027	3.30414	-3.28824	-0.76667	-0.815042	-0.321564	-0.655947	2.0312	-1.18699	-0.0534946	-0.447986	-0.650387	0.367574	-0.219245	0.421524	0.386767	-0.352005	-0.143938	0.0288955	-0.117343	-0.0455526	-0.0380528	-2.84061e-16
Fennel's 3-way Hybrid	-3.76414	-1.83254	0.655216	-0.835902	1.23978	-0.170747	1.35135	0.562906	1.97965	-1.36145	1.39951	3.32875	-0.049112	-0.396109	-0.550876	0.129788	-0.709906	-0.0989295	-0.186099	0.00846542	0.0552799	0.00780552	-0.000875151	1.32186e-15
Fry	3.73473	-0.244702	0.507397	-1.93221	2.14311	3.87382	-1.42217	1.25347	-1.47896	0.205792	0.207519	0.396322	2.26355	-0.0897671	0.945576	0.368059	-0.612997	0.269571	0.0488175	-0.306342	-0.121375	0.0460105	-0.0660877	-5.75928e-16
Ga. 1-6-14	-1.72922	0.062037	0.0776523	1.78571	-0.155561	1.63104	-0.752268	-0.344197	0.305799	-0.647062	-0.871788	0.0875932	-1.37384	0.289421	1.23685	-1.35974	-0.174895	-1.04503	-0.945471	-0.410814	-0.700723	-0.170467	-0.000487415	-7.63278e-17
Ga. 13-3-36	1.81444	1.9499	-3.73611	3.34979	0.426466	-1.05112	-1.58882	-0.783288	1.85887	-2.26057	0.503351	-0.801332	1.84467	0.0776183	-0.540631	-0.682562	0.00279313	0.118008	0.324419	-0.499137	0.106729	0.0641231	0.0590711	-8.04912e-16
Ga. 18-5	3.08235	-1.81888	-4.66463	0.595265	-0.96653	-2.00086	-0.111809	3.35737	0.260599	1.73961	-1.77277	0.868409	0.0151409	0.0864846	-0.186299	0.587866	-0.0989758	-0.596615	0.0637162	-0.06017	-0.109835	-0.00720295	-0.0123097	3.93782e-16
Golden Isles	-1.61969	-0.7946	-0.93612	0.577449	0.222602	0.767197	-0.309315	-0.218396	-0.294242	-0.420771	0.377008	0.072272	1.45744	-0.250387	-0.0276532	0.17758	1.52196	-0.680015	-0.530939	1.42651	-0.054444	-0.13363	-0.0439964	2.94903e-16
Hall	0.974997	1.9331	-2.44521	-0.905062	1.45969	-0.286046	1.37904	-3.26397	-0.863382	1.3745	-0.32802	0.793468	0.118737	2.5629	-0.620164	0.359811	-0.27863	0.0405282	-0.291242	0.0403995	-0.145993	0.0423381	-0.00881877	-3.1225e-17
Lane	-2.00728	6.94117	-1.01649	-4.21814	-0.924568	-0.483766	0.361207	0.97386	-1.02134	-1.34538	-0.802048	-0.209189	-0.239963	-1.10698	-0.691531	0.126066	0.0673363	0.171657	-0.696621	-0.135355	0.0343011	-0.0136664	0.04762	-3.7817e-16
Magnolia	-2.39345	-1.82728	0.33793	-0.840949	0.517119	0.443015	0.9594	0.593197	0.290147	0.122781	0.211221	-1.01669	-0.0225149	0.214335	-0.192247	0.342149	0.30809	0.388565	0.36942	-0.0515526	-0.579109	0.0801057	0.760921	-9.71445e-17
Magoon	0.53279	-1.15466	-0.00617405	0.901559	-2.14759	-0.218369	0.863459	-0.583908	-2.09734	-0.361079	1.51304	-0.0705224	-0.0260461	0.0369656	0.596532	0.780913	0.0564881	-1.17318	-0.227861	-0.618327	0.867154	-0.11031	0.216471	-2.74086e-16
Noble	-2.91812	-1.70347	0.483004	-0.417803	-0.556186	0.415196	1.05377	0.508266	0.281761	-0.104316	-0.0318672	-0.966603	-0.0190497	0.40194	0.0392628	-0.0882638	0.408688	-0.108566	-0.240463	-0.217487	0.0673352	1.06604	-0.248861	2.11636e-16
Oh My!	-2.06725	-0.8693	1.17361	0.952781	0.445742	0.432614	0.619394	0.884429	-0.472599	0.0946371	0.243631	0.209542	-0.317628	0.521179	-0.660325	0.35621	1.68113	0.838405	0.19447	-0.957085	-0.172725	-0.42226	-0.288789	-5.39499e-16
Paulk	-0.696902	2.9675	0.917933	0.568581	-2.11475	0.439707	-1.17877	-0.576606	2.49564	3.64604	1.53729	-0.0468653	0.33603	-0.73208	0.384264	0.247513	0.00917759	0.367395	-0.446735	-0.0921179	0.0117131	-0.00817454	0.0141062	-1.35308e-15
Pineapple	2.80761	-0.884936	-1.9372	0.0626742	-0.136496	-1.0958	0.842542	0.294758	-0.42512	-0.487619	0.206291	0.515425	-0.926905	0.171594	1.82173	-1.03049	0.243711	1.74745	-0.358775	0.380684	0.425036	0.0118637	0.071154	2.35922e-16
Ruby Crisp	-2.90256	3.52255	0.967279	-1.55831	0.535531	-0.0840005	0.136954	0.469336	1.03393	0.0536422	-0.416298	0.163847	-0.368995	0.893452	1.38074	-0.304329	0.282814	-0.72892	1.71861	0.216213	0.269577	-0.0646515	-0.0560498	5.68989e-16
Scuppernong	0.421157	-0.592994	-2.555	1.06755	3.08029	1.01543	0.321746	-1.91903	0.375822	0.00823908	-0.517367	-0.758268	-1.77833	-2.13806	0.298883	1.49783	-0.0925622	0.00154725	0.290239	0.0280635	0.0519475	0.0250546	-0.101242	1.59107e-16
Southern Home	1.32717	0.872636	-0.54695	1.2123	-2.14005	-0.855193	-0.123742	0.526528	-1.92674	-0.657249	2.42678	-0.337341	-0.848048	0.0209306	-0.184085	0.284528	-0.738102	0.150205	0.666773	0.446367	-0.818124	0.031913	-0.212054	-3.50414e-16
Supreme	2.36985	-0.982183	-0.430729	-0.871444	1.21185	1.54531	-0.569803	0.206853	-0.931448	1.45973	0.65206	-0.105867	-1.07663	-0.652432	-1.74387	-2.21882	0.0654917	-0.329483	0.391477	0.109513	0.388171	0.0160999	0.0499259	1.83881e-16
Tarheel	-2.40475	-1.75846	0.200722	0.656273	-3.98288	3.06203	-1.89979	-0.924484	0.214098	-0.871534	-1.86522	0.407159	-0.439071	0.487715	-0.737369	0.488082	-0.491662	0.673641	0.343286	0.297192	0.301476	-0.0661775	0.0120838	3.7817e-16
V. popenoei DVIT 2970	-4.38476	-2.69798	1.57228	-1.99342	1.31375	-3.94427	-4.40356	-0.955887	-1.11833	0.324407	-0.208488	-0.106474	0.145108	-0.105175	0.162444	0.00670623	-0.189354	0.0993921	-0.0998304	-0.092863	0.0109402	-0.0055233	-0.020485	2.15106e-16

## Sheet: Table S5
Table S5: PCA loadings showing contribution of each volatile compounds to different principal components.
Volatile compounds	PC1	PC2	PC3	PC4	PC5	PC6	PC7	PC8	PC9	PC10	PC11	PC12	PC13	PC14	PC15	PC16	PC17	PC18	PC19	PC20	PC21	PC22	PC23	PC24
(Z)-4-Decen-1-ol	0.204278	-0.0679931	0.126471	-0.203638	-0.0329058	0.226636	-0.133432	-0.00937172	-0.00162588	-0.136301	0.00472602	0.000679888	0.175754	0.0948906	0.0870644	0.258075	-0.116464	-0.116458	-0.0384589	-0.266772	0.17146	-0.120075	-0.0189562	-0.00668895
beta-Ocimene	-0.0144524	0.11828	0.0426679	0.0312794	-0.169566	0.0367709	-0.113591	-0.0686482	0.337578	0.538352	0.295634	-0.00942376	0.0708416	-0.191511	0.132702	0.0890824	0.00496459	0.205871	-0.324846	-0.0977734	0.0186773	-0.0246483	0.0765272	-0.306994
beta-Pinene	-0.0226886	0.406383	0.0206218	-0.151426	-0.0178054	-0.0109243	-0.0249771	0.045872	0.0177121	0.0275242	-0.0543668	0.0133468	0.00331783	0.0472585	0.0458405	0.0692188	-0.0688829	-0.0462878	0.0564129	-0.0144153	0.0550371	0.0143444	0.0448301	0.205179
1-Hexanol	0.258506	-0.0543283	0.113297	-0.080363	0.00964364	0.093757	-0.0846793	0.106195	-0.072269	0.170138	0.137103	0.027963	0.06558	0.110614	-0.159836	0.102737	0.12275	0.114241	0.0999482	-0.00982212	-0.400105	-0.205252	0.485151	0.113673
1-Octanol	0.21312	-0.0191382	0.148142	-0.112777	0.0133628	0.274305	-0.156217	0.0787064	-0.0372812	-0.0696862	-0.0827989	-0.00802661	0.178997	0.0211207	0.0281173	0.214454	-0.197831	0.142256	0.187061	-0.173153	0.0917347	0.309854	0.0166706	0.0682406
1-Oxaspiro[4.5]dec-6-ene, 2,6,10,10-tetramethyl-	-0.0780612	-0.0730421	0.0304561	-0.0459856	0.0994091	-0.0142789	0.130221	0.0670171	0.267781	-0.201024	0.269136	0.669351	-0.0103538	-0.103621	-0.190239	0.0467118	-0.384022	-0.0554356	-0.135323	0.00898515	0.0881472	0.0235356	-0.00474777	0.0424979
2,4-Hexadienal, (E,E)-	-0.108124	-0.115734	0.0816687	-0.116069	0.141867	-0.319083	-0.402105	-0.100035	-0.114322	0.0348555	-0.0193149	0.0101409	0.0249628	-0.0290365	0.064467	0.0335325	-0.133931	0.0467913	-0.0364654	-0.0885071	-0.00950699	-0.0619414	0.00207729	-0.121388
2-Butenoic acid, butyl ester	0.118213	0.0894046	-0.269827	0.172223	0.194838	0.00952888	-0.110327	-0.16354	0.0506948	-0.163326	-0.0283789	-0.0208377	0.297692	0.122336	-0.0785182	0.00467272	0.156897	-0.14175	-0.214288	0.210777	-0.0371723	0.0405034	0.0351338	-0.0445861
2-Butenoic acid, ethyl ester, (E)-	0.111042	0.0293536	0.0802378	-0.0836324	0.205662	0.34282	-0.170173	0.166077	-0.215715	-0.00391738	0.0109477	0.0557452	0.344238	-0.0922835	0.0494774	-0.156884	0.035271	-0.196792	-0.298364	0.340949	-0.116761	-0.045825	-0.165395	-0.110855
2-Butenoic acid, ethyl ester, (Z)-	0.17076	0.0192459	-0.273978	0.135372	-0.107547	-0.227811	-0.0216417	0.134783	-0.0164361	-0.0571326	0.0700037	0.0826476	0.0311567	0.19573	0.202561	-0.0454915	-0.0289146	0.12057	-0.0598233	0.0821418	0.103108	-0.00971383	0.157684	0.140311
2-Hexen-1-ol, (Z)-	-0.0617798	-0.0625292	0.0101338	0.077942	-0.29582	0.29528	-0.199607	-0.11881	0.0453162	-0.160799	-0.402869	0.082463	-0.217188	0.150687	-0.0350049	-0.0653424	-0.285066	0.0737596	-0.0892157	0.086136	-0.0768409	-0.417475	0.0583317	-0.186428
2-Hexen-1-ol, acetate, (Z)-	0.0154439	0.0984908	0.243447	0.276477	0.164564	-0.0393902	0.00867019	0.203702	-0.109251	0.00984929	-0.12257	0.0560464	-0.11063	0.166144	-0.255893	0.209157	0.289272	0.289927	-0.127242	-0.166336	0.220458	-0.242436	-0.226933	-0.02099
2-Hexenal, (E)-	-0.0297342	0.026835	-0.00949183	-0.0661206	0.454529	0.0233652	0.283927	0.105933	0.300671	-0.106425	0.0193567	-0.0144906	0.134385	-0.00297634	0.141241	0.0562866	0.0223712	0.179644	0.119979	-0.0639195	-0.138274	-0.36284	-0.062456	-0.13283
2-Hexenoic acid, ethyl ester	0.063922	-0.0724977	-0.216824	0.0327474	-0.077499	-0.167324	-0.0107744	0.399714	0.0352505	0.256861	-0.340918	0.174621	0.00319199	0.0226242	-0.0643366	0.211579	-0.0535407	-0.334316	0.0463315	-0.0638641	-0.175139	-0.0217188	-0.0667813	-0.0785166
3-Carene	-0.0123477	0.396309	-0.0117781	-0.15041	0.01492	-0.00820846	0.00606547	-0.0575899	0.0038653	0.0892611	-0.0369088	0.0670441	-0.010074	0.217415	0.0376185	0.0466113	-0.0750488	-0.0301893	0.0647388	0.078441	0.0578203	0.0381169	0.00233202	-0.0608572
Acetic acid, 2-phenylethyl ester	0.0447806	0.182427	0.117355	0.394319	0.11502	-0.0964313	-0.0892242	0.10916	0.0339819	-0.0505729	0.00100853	0.00563543	-0.0966051	0.081157	-0.00660866	0.0150981	-0.118887	0.116222	-0.0238185	0.05684	-0.209073	0.106872	-0.0315087	0.0200338
Acetic acid, butyl ester	0.222797	0.0792322	-0.0476654	0.114565	-0.00646504	0.0047903	0.0471065	-0.0949258	-0.314047	0.00650854	0.385074	-0.102666	-0.00188437	-0.0978364	-0.124864	0.0891442	-0.0851635	-0.140093	0.0811642	0.0212316	0.0109958	-0.330511	-0.178132	-0.171556
Acetic acid, hexyl ester	0.251725	-0.0462378	0.137672	-0.0587152	-0.173234	-0.13081	0.100536	-0.0832996	-0.0757801	-0.0812822	0.150576	-0.0203329	-0.0204538	-0.000167513	0.104613	0.113969	-0.0392898	-0.19554	-0.000833743	-0.0648647	0.100371	-0.211714	-0.0183302	0.287005
Acetic acid, octyl ester	0.222777	-0.025036	0.240735	-0.0990449	-0.0645129	-0.0946793	0.0344235	-0.0586009	0.202032	-0.118754	-0.118386	-0.0518155	-0.0301037	-0.0045244	-0.0332448	0.112699	0.11978	-0.0632611	-0.127599	0.0783811	-0.185455	0.32948	-0.283885	-0.161871
Acetic acid, pentyl ester	0.192068	0.022873	0.207412	0.105194	-0.111789	-0.165196	0.0492957	0.0392391	-0.14572	-0.188789	0.220446	-0.0290084	-0.244106	0.0926285	0.0997269	0.195915	-0.125258	0.0239123	-0.0436282	0.335194	0.0978694	0.0780792	0.132364	-0.326619
Acetic acid, phenylmethyl ester	0.0922561	0.0394163	0.218514	0.145483	-0.0923324	-0.19119	0.232237	-0.146753	-0.0433008	-0.0135663	-0.294769	0.0201668	0.308989	-0.30205	0.015955	-0.210166	-0.155913	-0.0571313	0.261202	-0.0577527	0.05725	-0.110367	0.0934791	-0.341627
Benzeneacetaldehyde	0.139292	0.124611	0.127546	0.192111	0.143525	0.112087	-0.156464	-0.0449343	0.207995	0.0358347	0.0279507	-0.114973	-0.3424	-0.151938	0.271725	-0.255613	-0.169623	-0.271982	-0.12892	-0.0747561	-0.156659	-0.109248	-0.00492908	0.257848
Butanoic acid, butyl ester	0.0828012	0.0502876	-0.272521	0.100566	0.264356	0.0216832	0.0272588	-0.302983	0.0147439	-0.0146323	-0.154352	-0.0598566	-0.18613	-0.179701	0.0214199	0.374243	-0.0409887	-0.0951592	-0.0821563	-0.0692332	0.086209	0.0770796	-0.0551633	-0.0979984
Butanoic acid, ethyl ester	0.135721	-0.0261898	-0.339915	0.156474	0.0053435	-0.106926	-0.0715553	0.0916643	0.00724093	-0.128222	-0.00564102	0.0401695	0.17343	0.0297717	0.292959	0.051181	0.0333858	-0.0530008	-0.06708	-0.133446	0.243895	-0.0525992	0.206121	-0.0878586
Caryophyllene	0.206688	0.000618406	0.032343	-0.0552615	-0.0320004	-0.0726608	-0.138763	-0.121032	0.386127	-0.217285	0.111586	-0.17203	0.0608824	0.029197	-0.287502	-0.179622	0.185072	-0.143981	0.0675655	-0.257718	0.0806764	0.00105982	0.0774933	-0.0738332
Citral	0.0353934	0.388034	0.0460682	-0.148079	0.00958105	-0.0030598	-0.0271769	-0.0247491	0.0316648	0.0992244	0.013973	0.0423976	0.00690388	0.225152	0.0645103	0.114604	-0.126561	-0.011198	0.145886	0.0908558	-0.0360998	0.0756705	-0.112212	-0.0916987
Citronellol	-0.0012873	0.30025	-0.161524	-0.0673738	-0.0968707	-0.120922	-0.034502	0.0501684	-0.0736809	-0.382124	0.0987487	-0.103798	0.0133153	-0.0967863	-0.0627073	-0.188962	-0.0983885	0.235588	0.0402539	-0.0996906	-0.289967	0.0478603	-0.08186	-0.0236158
D-Limonene	-0.0772382	0.348034	-0.0110279	-0.219463	-0.0781278	-0.0115219	0.0025041	0.0559163	0.0791266	0.0445698	-0.0762917	0.00242045	-0.0467052	-0.0859922	0.147354	-0.00857628	0.18107	-0.167863	0.141755	0.116784	0.210098	-0.214334	0.0183563	-0.0539301
Estragole	0.112547	0.0780275	0.313266	0.195046	-0.022919	-0.147283	0.110356	-0.0690792	0.0231611	0.0894935	-0.206068	0.0542761	0.179492	-0.192469	-0.0770719	0.0500654	0.0237525	-0.0478526	-0.101084	0.212409	0.0919432	0.0890442	0.278072	0.233371
Ethyl Acetate	0.236138	0.103926	-0.0932333	0.0267383	-0.140993	-0.145053	0.00787424	0.164872	-0.0704649	0.205102	0.0365649	0.0121672	0.139538	-0.0782964	-0.214063	-0.193139	-0.195161	0.0112854	-0.040349	-0.166383	-0.0149509	-0.0617124	-0.366718	0.0970458
Eucalyptol	-0.0855957	-0.13391	-0.00640691	-0.0525671	0.0304696	-0.0258432	0.257562	0.228549	0.144965	0.0543587	-0.0229591	-0.604351	0.105931	0.202559	-0.0790379	0.0337701	-0.450301	0.00599077	-0.230353	0.0917137	0.138939	-0.00724088	0.0232149	0.0295257
Formic acid, heptyl ester	-0.0025976	0.0420889	-0.171487	0.198225	-0.259	0.107065	-0.276327	-0.119523	0.29639	-0.022899	0.00529719	-0.0614262	0.20265	-0.120092	-0.226867	0.181958	-0.0423666	0.224423	0.199806	0.313007	0.109546	-0.0922845	-0.138106	0.178418
Furan, 2-pentyl-	-0.0909317	-0.107537	0.0730836	-0.109664	0.10534	-0.329843	-0.424344	-0.113804	-0.151274	0.0478999	-0.0400938	-0.02141	0.0305916	-0.0275135	0.0560986	0.00241364	-0.102431	0.0556949	-0.0725921	-0.0985643	0.0174448	-0.0166542	-0.111133	0.0191621
Geranic acid	-0.0416271	0.276664	-0.0472493	-0.232053	-0.0741344	-0.0404553	0.0348074	0.115944	-0.138154	-0.198651	-0.15424	-0.042064	-0.0505888	-0.289584	-0.238814	0.0453725	0.0364254	0.0961887	-0.506551	-0.143665	0.0546953	-0.0412077	0.258343	0.0243307
Heptanoic acid, ethyl ester	0.241696	-0.0953631	0.0426704	-0.163871	-0.0515278	-0.11097	-0.0214492	0.0517721	0.238901	-0.0615133	-0.0951928	-0.0190379	-0.239304	0.0400945	-0.0452231	0.0224501	0.213635	-0.0996707	-0.079837	0.124374	0.0381007	-0.11472	-0.117319	0.00576631
Hexanal	-0.119472	-0.0273393	0.118308	-0.201582	0.28017	-0.317237	-0.198486	0.0200547	0.128813	-0.0195601	0.00301625	-0.0589587	0.0761391	0.0226509	-0.135839	0.0364349	-0.0898054	-0.0407366	0.102324	0.287866	0.0273487	-0.188208	0.0963491	0.0939761
Hexanoic acid, 1-methylethyl ester	0.121589	0.0422743	-0.0449209	-0.0538048	0.00775443	-0.113487	0.195423	-0.482622	-0.0103977	0.139289	-0.107755	0.132286	0.120297	0.467484	-0.0918066	-0.0737747	-0.0813239	0.0197866	-0.205294	-0.122206	-0.199185	-0.0342897	0.0309075	-0.00193498
Hexanoic acid, butyl ester	0.219923	0.00628517	-0.127529	-0.048496	0.216297	0.0423383	0.123803	-0.23284	-0.109058	0.157996	-0.123482	-0.0205898	-0.107139	-0.240468	-0.0370701	0.0962033	-0.137379	0.185542	0.0295364	0.0822076	0.0180424	-0.0522418	-0.0763053	0.297378
Hexanoic acid, ethyl ester	0.261887	-0.0445947	-0.149456	-0.05587	-0.0460169	-0.130229	-0.0543761	0.212406	0.101126	0.0399622	-0.0751937	0.0408811	-0.0585868	-0.0214619	-0.00273187	-0.0378808	-0.0176841	0.0292694	0.0301305	0.0638878	-0.11343	0.00228665	-0.0308785	-0.0494179
Hexanoic acid, hexyl ester	0.235244	-0.0924636	0.0634842	-0.150975	-0.0388285	-0.0545247	0.0587326	0.0239481	0.0609103	-0.0834082	-0.134173	0.0928378	0.0875822	-0.0479522	0.441272	-0.107367	0.0665247	0.429418	-0.102945	0.0824874	0.00929299	-0.0574973	-0.154333	0.0776759
Hexanoic acid, propyl ester	0.215679	-0.0698604	-0.0797626	-0.161529	0.140493	0.0837821	-0.0197491	-0.0150369	-0.067336	0.19543	-0.0148372	0.0945145	-0.1878	0.119776	-0.208126	-0.437592	-0.000719335	0.112388	0.0242435	0.152691	0.432822	0.0740753	0.0275576	-0.091119
Octanoic acid, ethyl ester	0.23311	-0.0373509	-0.1758	-0.144257	0.171077	0.0582884	-0.0360354	0.0505047	-0.0060744	0.0386733	-0.0511232	-0.0664506	-0.211254	-0.189316	-0.124208	0.0410901	-0.109909	0.126957	0.169586	0.0304938	-0.107603	0.113915	0.217924	-0.237569
Phenylethyl Alcohol	0.10877	0.173632	0.133036	0.280653	0.243133	0.0849948	-0.170614	0.132864	0.0635216	0.0032409	-0.0675405	0.000875436	0.00750526	0.112645	0.0165353	-0.17774	-0.0937423	-0.0196088	0.0733461	-0.208295	0.177715	0.0911453	0.122163	-0.0427376

## Sheet: Table S6
Table S6: Abundance of volatile compounds (ng/g of sample) of various chemical classes in muscadine genotypes.y
Genotype	Chemical class
	Alcohol			Aldehyde			Aromatic hydrocarbon			Ester			Furan			Monoterpene			Sesquiterpene
AM-195	664.374		b	2674.91		abcde	193.069		a	3055.4		def	0		b	313.73		de	0		b
AM-77	138.1		de	2113.26		cdef	156.15		ab	2570.38		efg	0		b	0		f	0		b
Carlos	7.85004		e	3774.43		ab	0		d	804.3		hijk	0		b	33.3663		f	0		b
Cowart	1375.14		a	2498.06		abcde	95.1731		bc	5333.4		ab	0		b	92.0184		f	21.4864		a
Fennel's 3-way Hybrid	0		e	3860.24		a	0		d	12.056		k	16.291		a	19.8159		f	0		b
Fry	1390.41		a	2873.16		abcd	0		d	3560.85		cde	0		b	195.844		ef	0		b
Ga. 1-6-14	146.481		de	1912.59		defg	0		d	1172.17		ghijk	0		b	98.1597		f	0		b
Ga. 13-3-36	277.095		cde	2684.51		abcde	12.3659		cd	5172.36		abc	0		b	186.529		ef	14.3667		ab
Ga. 18-5	239.371		cde	1937.17		defg	0		d	6154.96		a	0		b	6.1621		f	0		b
Golden Isles	63.2909		e	2482.2		abcde	26.2981		cd	1751.28		fghij	0		b	36.4507		f	0		b
Hall	196.531		cde	2625.61		abcde	0		d	3321.29		def	0		b	615.478		bc	0		b
Lane	86.1528		e	2602.91		abcde	0		d	2132.75		efgh	0		b	997.343		a	0		b
Magnolia	206.74		cde	3152.53		abcd	0		d	298.471		jk	0		b	12.705		f	0		b
Magoon	317.288		cde	983.495		fg	25.6841		cd	3278.14		def	0		b	10.1829		f	0		b
Noble	66.4325		e	2290.92		cdef	0		d	306.05		jk	0		b	19.8197		f	0		b
Oh My!	221.816		cde	2775.36		abcd	8.82228		cd	876.423		hijk	0		b	1.66281		f	0		b
Paulk	262.411		cde	1880		defg	60.9939		cd	2394.12		efgh	0		b	482.266		cd	3.25365		ab
Pineapple	192.462		cde	2379.92		bcdef	0		d	4482.43		bcd	0		b	71.1476		f	0		b
Ruby Crisp	161.555		cde	3495.1		abc	4.22971		d	380.79		ijk	0		b	709.583		b	0		b
Scuppernong	151.535		de	3236.15		abcd	0		d	1990.8		efghi	0		b	14.4009		f	0		b
Southern Home	244.553		cde	1263.32		efg	0		d	4487.41		bcd	0		b	184.575		ef	0		b
Supreme	477.651		bc	2007.44		defg	0		d	3399.28		de	0		b	48.1226		f	5.78389		ab
Tarheel	447.305		bcd	567.816		g	0		d	200.379		jk	0		b	8.76324		f	0		b
V. popenoei DVIT 2970	29.4168		e	2886.19		abcd	2.67993		d	115.493		k	16.991		a	0		f	0		b
Means with different letters in the same column indicates significant differences (Tukey HSD test P < 0.05).
yOnly statistically significant volatiles compounds were taken in calculating sum for each chemical class.

## Sheet: Table S7
Table S7: Color, firmness, titratable acidity (TA), and total soluble solid (TSS) contents of muscadine genotypes.
Genotypey	Color components															Firmness (N)			TA (%)z			TSS (%)
	L*(C)			a*(C)			b*(C)			C*(C)			h(C)
AM-195	28.19		fg	9.1		b	1.76		hi	9.38		de	9.53		e	2.5		cdef	0.375		de	14.2
AM-77	24.06		h	2.44		ghi	0.34		i	2.49		ij	71.23		ab	2.01		fg	0.618		cde	14.3
Carlos	47.54		ab	0.16		ij	14.38		c	14.47		c	89.16		ab	2.17		efg	0.493		de	11.5
Cowart	25.95		gh	5.23		cdefg	1.46		hi	5.48		gh	14.83		cde	2.15		efg	0.463		de	14.4
Fennel’s 3-way Hybrid	24.71		h	2.7		fghi	0.12		i	2.72		hij	76.16		ab	1.93		fg	1.313		b	12.3
Fry	46.53		abc	-3.04		kl	17.11		ab	17.43		ab	99.81		a	2.87		bcde	0.528		de	13.1
Ga. 13-3-36	46.3		abcd	-3.21		l	13.54		cd	13.98		c	103.41		a	3.41		ab	0.563		cde	14.1
Ga. 1-6-14	43.89		cde	4.52		defgh	12.31		de	13.62		c	70.1		ab	2.52		cdef	0.638		cde	15.3
Ga. 18-5	24.54		h	0.82		ij	0.79		i	1.25		j	51.85		bcd	2.13		fg	0.81		cd	13.5
Golden Isles	41.47		e	2.01		hi	9.73		f	10.15		d	76.59		ab	2.09		fg	0.523		de	12
Hall	49.33		a	-0.17		ijk	15.01		c	15.14		bc	90.31		ab	2.49		cdef	0.48		de	12.9
Lane	25.53		gh	2.75		efghi	0.44		i	2.8		hij	53.27		bc	2.92		bcd	0.303		e	13.8
Magnolia	45.38		abcde	-2		jkl	15.18		bc	15.38		abc	97.17		ab	1.61		g	0.675		cde	11.5
Magoon	24.88		gh	6.74		bcd	1.22		hi	6.86		efg	10.13		e	2.26		defg	0.67		cde	15.5
Noble	26.58		fgh	3.96		defgh	0.73		i	4.09		ghi	10.45		e	2.1		fg	0.408		de	12.5
Oh My!	44.09		bcde	2		hij	11.12		ef	11.45		cd	79.6		ab	2.14		efg	0.815		cd	13.7
Paulk	26.78		fgh	5.62		cdef	0.75		i	5.67		fg	7.6		e	3.38		ab	0.383		de	14.5
Pineapple	43		de	-1.27		jkl	14.59		c	14.7		bc	94.95		ab	1.97		fg	0.713		cd	13.5
Ruby Crisp	29.64		f	14.87		a	3.49		g	15.29		bc	12.77		de	3.34		ab	0.48		de	12.7
Scuppernong	46.16		abcd	-1.05		jkl	18.24		a	18.53		a	93.05		ab	1.94		fg	0.91		c	13.1
Southern Home	26.78		fgh	5.69		cde	1.17		hi	5.81		fg	11.7		e	3.18		abc	0.475		de	12.4
Supreme	25.85		gh	4.38		defgh	0.99		hi	4.53		ghi	21.42		cde	3.88		a	0.45		de	14.7
Tarheel	25.54		gh	1.74		hij	0.4		i	1.8		ij	23.91		cde	1.98		fg	0.558		cde	11.6
V. popenoei DVIT 2970	26.1		gh	7.74		bc	2.66		gh	8.37		def	18.27		cde	2.93		bcd	1.908		a	10.2
Means with different letters in the same column indicates significant differences (Tukey HSD test P < 0.05).
yUnderlined genotypes were used in the study of difference in aroma volatile composition between black and bronze muscadines.
zTitratable acidity (%) expressed as tartaric acid.
